# Supplementary material
Source: publisher figshare collection journal article supplement (https://geolsoc.figshare.com/ndownloader/files/30897250)
Supplement: Supplementary file 1 [file 30897250]

## Sheet: Feuil1 (2)
LA-ICP-MS ID	Py generation	Facies	Si	S	V	Cr	Mn	Fe	Co	Ni	Cu	Zn	Ga	As	Se	Mo	Ag	Cd	In	Sn	Sb	Te	W	Au	Tl	Pb	Bi
GS-22-10
1_z1_1	2		3680	498049	0.33	2	13.9	495596	139	1390	1063	10.6	0.13	38.7	5.2	1.1	0.1	0.12	0.19	<0.16	0.04	<0.42	0.29	2.7	0.09	2.5	2.6
1_z1_2	1b	disseminated-altered	9002	488306	39.5	8.2	118	489215	36.6	9.5	282	846	1	102	4.6	0.45	2.3	0.98	0.07	3.8	2	5.5	6.5	0.52	0.16	151	1.9
1_z1_3	2		1212	543009	<0.34	<5.2	4	454041	634	160	874	2.2	0.1	57.1	<21.5	<0.26	0.15	<0.37	<0.02	<0.54	0.2	<0.84	0.71	0.18	<0.12	0.71	0.13
1_z1_4	1b	disseminated-altered	1164	462782	5.3	<0.92	270	532462	366	23	993	53.2	0.32	92	<3.7	0.48	4.6	<0.07	<0.004	0.13	7.2	<0.15	0.28	0.12	0.33	835	5.1
1_z2_1	2		4182	513629	2.4	1.9	903	480409	183	259	93.7	247	0.3	72.1	5.8	0.36	0.14	0.2	0.01	0.32	0.07	<0.24	1.1	0.56	<0.007	2.8	4.1
1_z2_2	2		447	536948	3.8	<0.96	7.8	461839	197	41.5	312	8	<0.02	174	7	<0.07	0.19	<0.10	0.02	0.88	0.13	<0.23	<0.14	0.78	0.09	2.7	0.9
1_z2_3	1b	disseminated-altered	3446	498653	1	<0.81	419	486491	182	87.8	1128	3514	0.22	52.7	4.6	1.1	6	3.6	0.04	<0.25	2.7	3	1.6	0.34	0.09	4932	19.7
1_z2_4	1b	disseminated-altered	7321	469187	1.9	1.1	110	519766	293	19.3	1065	799	0.5	40.3	<2.3	<0.05	6.8	0.16	0.02	0.19	5.3	1.5	0.22	0.13	0.28	1014	34.4
1_z3_1	2		<482	521266	0.65	<1.3	246	477636	64.3	44	64.3	3.3	0.06	327	8.2	<0.40	0.44	<0.16	<0.04	<0.34	0.79	1.5	2.9	<0.02	<0.01	31.9	3.1
1_z3_2	1b	disseminated-altered	1988	505019	8	<0.94	1032	486252	384	23.9	228	5.7	0.38	3583	5.1	0.62	3.9	0.36	<0.03	0.31	3.8	3.7	13	0.45	0.1	126	77.9
1_z3_3	2		662	527121	1.5	1	85.5	469297	122	89.7	15.9	3.8	<0.02	863	11	1.6	0.44	<0.11	<0.007	0.13	1.7	2.3	1	0.06	<0.008	37	3
1_z6_1	2		943	547733	0.8	<1.2	71.2	448240	278	63.9	36.7	1068	0.15	1414	<8.5	0.26	1.1	1.7	<0.05	<0.43	1.8	1.9	0.69	0.08	0.02	43.4	8.4
1_z6_2	1b	disseminated-altered	968	489097	<0.32	1.2	29.8	458528	103	11.1	24.5	4.4	<0.02	197	7	<0.08	0.39	<0.12	<0.04	<0.30	0.15	1.1	0.08	0.09	0.07	18.3	50948
1_z6_3	1b	disseminated-altered	3997	482307	2	11	128	512334	121	17.8	76	17	0.59	58.6	<3.0	<0.38	4.6	<0.11	0.02	<0.40	1.5	0.74	0.1	<0.01	0.22	682	4.2
1_z6_4	2		978	510880	1.2	<0.64	259	482226	157	154	1607	978	0.13	2523	3.4	<0.36	1.8	<0.08	0.01	0.2	8.2	2.3	0.11	0.14	0.31	126	28
GS-38-12
2_z1_1	4	polymetallic breccia	280	532039	0.14	<0.60	0.9	466533	583	502	5.8	9.6	<0.06	5.8	39.1	<0.05	0.1	<0.07	<0.02	<0.15	0.1	0.3	<0.02	0.05	<0.005	0.47	<0.02
2_z1_2	4	polymetallic breccia	<673	577199	0.37	<2.0	3	416064	538	914	144	8.9	0.31	6.9	68.5	<0.17	<0.20	<0.24	<0.02	<0.41	0.43	<0.55	<0.08	0.05	0.48	0.34	5050
2_z2_1	4	polymetallic breccia	<237	531147	0.24	<0.70	<0.29	466935	447	484	907	6.1	<0.02	5	44.7	3.3	10.5	<0.08	0.22	0.2	1.4	<0.20	<0.03	0.38	0.02	0.69	0.06
2_z2_2	4	polymetallic breccia	<391	535843	<0.35	<0.77	0.85	463063	473	186	33.7	300	1.6	14.6	49.1	0.45	0.83	0.22	<0.46	<0.20	4.5	0.5	<0.05	0.03	0.12	0.25	0.07
2_z3_1	4	polymetallic breccia	<447	573885	0.45	<1.2	<0.39	419234	848	5739	214	1.8	<0.13	23.4	48.4	<0.10	<0.03	<0.15	<0.01	<0.36	0.08	1.5	<0.05	<0.01	<0.01	0.93	<0.09
2_z3_2	4	polymetallic breccia	<344	555964	<0.18	<0.88	0.46	434872	398	2210	6452	2.2	0.45	19.5	45.5	<0.08	6.5	<0.11	0.03	1.1	0.53	4.2	0.05	0.66	<0.008	13.1	7
2_z3_3	4	polymetallic breccia	<237	537662	<0.16	<0.57	0.77	459928	601	1749	6.1	1.3	<0.02	10	37.1	<0.06	<0.07	<0.08	0.02	<0.18	0.02	<0.79	<0.03	<0.009	<0.006	0.3	0.07
2_z4_1	4	polymetallic breccia	<342	551091	3.5	<1.3	<0.53	448474	242	98.8	<7.0	3.2	<0.10	3.5	36.1	1.5	0.08	<0.15	<0.07	<0.44	0.61	1.8	<0.05	36.1	<0.01	2.3	0.04
2_z4_2	4	polymetallic breccia	341	527482	0.26	<0.63	<0.29	469978	329	1633	177	2.8	0.04	5.7	46.1	<0.05	0.12	<0.08	<0.02	1.5	0.01	<0.18	<0.03	0.08	<0.005	0.72	0.03
2_z4_3	4	polymetallic breccia	<415	523404	0.23	<0.62	2.1	474876	451	1075	147	2.1	<0.09	10.5	28.2	<0.32	0.32	<0.10	0.01	0.24	<0.09	<0.23	<0.16	0.14	0.02	0.68	0.21
2_z4_4	4	polymetallic breccia	<254	541609	<0.36	<1.1	0.82	457238	113	780	161	6.9	0.04	7.6	71.7	0.11	1.5	<0.12	<0.07	0.16	0.39	<0.26	0.18	0.1	<0.008	3.9	<0.03
GS-36-04
3_z1_1	4	disseminated	<394	529679	<0.19	<1.4	<0.54	465531	21.8	91.6	293	22	0.03	52.2	9.3	<0.09	422	0.49	0.03	0.12	20.2	367	<0.04	0.47	0.01	3482	3.8
3_z1_2	4	disseminated	255	502639	0.14	2.1	8.5	496756	17.2	21.6	255	12.4	0.02	20.9	8.2	0.07	<0.05	0.1	0.02	0.12	0.15	<0.13	<0.02	0.08	0.01	1.1	0.05
3_z1_3	4	disseminated	17819	489816	0.26	<1.3	144	490660	65	10.8	194	9.4	1.4	760	7.3	10.1	1.8	0.26	0.02	0.41	13.6	5.3	2.3	0.43	1.1	65.9	0.06
3_z1_4	4	disseminated	16089	526535	1.3	1.1	39.7	452709	140	32	1323	20.9	1.3	648	<7.7	30.6	6.5	<0.12	<0.04	0.86	42.5	15.3	5.9	1.1	4	203	0.98
3_z2_2	4	disseminated	72482	526985	<0.70	<4.1	20.1	397370	26.8	<18.8	546	64.8	2.2	1842	<8.7	4.3	7.8	0.65	<0.03	<0.60	56.3	24.7	0.27	1.2	8.5	336	0.63
3_z2_3	4	disseminated	96646	462665	<0.63	<3.6	<1.3	440389	19.2	<16.8	<22.2	4.6	<0.08	146	<7.9	1.9	6.9	<0.43	<0.03	0.65	11.3	5.5	<0.14	0.27	0.57	46.6	0.45
3_z2_4	4	disseminated	33706	481366	0.17	<1.8	0.86	483519	32.3	<5.5	61.4	3.1	<0.16	373	9.3	2.1	19.7	<0.15	<0.01	0.38	12.3	19.4	0.08	0.34	0.74	872	1
3_z3_1	4	Qz veinlet	197	509955	0.38	4.5	0.89	488946	2	357	471	9.5	0.08	28.2	7.6	<0.04	0.32	0.13	0.02	0.55	0.29	0.61	0.04	0.05	0.27	12	0.12
3_z3_2	4	Qz veinlet	347	549858	<0.25	<0.96	1.7	449094	25.8	19.1	226	5.3	0.07	35	11.5	0.36	<0.17	<0.10	<0.03	<0.23	0.1	0.35	0.16	374	0.04	0.72	0.05
3_z3_3	4	Qz veinlet	258	510184	0.15	<0.81	2.5	488034	3.5	162	28.8	23.6	<0.01	32.2	7	0.14	1.7	0.13	<0.04	<0.20	2.3	1.6	0.05	0.27	0.03	1255	0.22
3_z3_4	4	Qz veinlet	<332	517113	<0.22	1.5	2.9	480532	13.3	53.2	190	14.9	<0.08	44.9	6.9	0.12	3.3	0.32	0.02	<0.27	20	4.3	<0.03	0.91	0.04	1995	0.25
3_z4_1	4	Qz veinlet	364	550306	<0.33	<1.1	3.7	448858	12.7	153	249	7.4	0.04	33.8	11	<0.46	0.7	0.13	<0.03	<0.27	<0.07	<0.27	0.23	0.05	<0.008	<21.1	<0.05
3_z4_2	4	Qz veinlet	250	528697	0.21	<0.58	1.8	470904	3.2	40.7	20	45.7	<0.01	13	6.8	0.26	0.68	0.53	<0.02	<0.14	0.31	0.36	<0.02	0.18	0.03	14.5	0.03
GS-55-02
4_z1_1	1b	disseminated-altered	1300	503180	12.4	13.8	94.7	492358	720	330	41.7	29.8	0.23	43.3	<2.9	<0.04	1.2	<0.06	<0.004	0.74	3.5	<0.14	0.31	0.04	0.13	245	1.2
4_z1_2	1b	disseminated-altered	5925	462924	57.3	34.6	1491	527382	261	146	176	43	1.8	40.7	2.9	0.08	3.5	<0.05	0.02	0.59	9.7	1.8	1.4	0.33	0.3	632	0.71
4_z1_3	1b	disseminated-altered	3966	502766	6.7	25.5	104	489323	2554	477	142	12.6	0.34	377	15.5	<0.04	1.4	<0.06	0.01	0.15	3	2.8	0.07	0.32	0.08	72.6	1.6
4_z2_1	2		6389	530434	<0.21	<0.56	0.48	454658	7132	379	4.6	5.3	0.02	891	23.1	<0.04	0.18	<0.07	<0.004	<0.19	17.1	0.3	0.29	0.25	0.02	3.4	0.27
4_z2_2	1b	disseminated-altered	1721	515656	7	8.5	91.4	479351	1217	748	116	12	0.19	315	7.5	<0.04	2.4	0.15	<0.02	0.37	19.1	2	0.04	0.24	0.08	236	4.7
4_z2_3	2		9133	445258	41.8	31.5	13586	520609	5206	1096	274	156	<0.57	4133	24.7	<0.43	1.1	<0.64	<0.04	<1.5	208	2.4	<0.98	0.55	0.59	153	2.7
4_z2_4	1b	disseminated-altered	13080	477532	82.4	30.6	246	498294	415	225	858	19.5	0.71	19.4	5.1	0.17	2.9	<0.07	<0.02	3	5.2	0.46	0.29	0.19	0.1	264	0.27
4_z3_1	1b	disseminated-altered	1306	490151	8.1	8.9	148	504942	785	1428	65.3	71.4	0.17	714	12.5	<0.12	1.1	<0.18	0.01	0.24	31.6	2.8	<0.01	0.27	0.21	53.6	1.7
4_z3_2	1b	disseminated-altered	3814	491427	20.4	21.8	228	502234	687	219	203	82.6	0.79	795	10	<0.03	2.3	0.18	0.01	0.41	4.5	2.9	0.06	0.41	0.07	164	2.2
4_z3_3	1b	disseminated-altered	5171	462369	43.3	28.9	201	517084	545	1221	169	19.4	0.67	128	22.5	1.4	3.5	<0.04	0.01	2.7	13.6	6.3	15.6	0.52	0.17	427	5.2
4_z3_4	2		518	486802	1.8	1.8	40.6	509339	365	1686	27	3.8	0.15	97.8	20.6	<0.02	0.27	<0.03	<0.002	0.1	0.31	0.19	<0.01	0.06	0.01	6.4	1082
4_z3_5	2		403	476831	1.4	1.7	45.9	515845	4205	559	954	3	0.07	1092	18.9	<0.09	0.62	<0.03	<0.002	<0.12	16.5	1.6	<0.01	0.2	0.01	15.3	1.3
4_z3_6	2		22026	469507	9.9	5.7	174	498488	6376	817	18	313	2.1	2145	19.7	<0.38	0.99	<0.06	<0.003	0.14	42.9	2.6	<0.02	2.1	0.08	21.4	3
4_z4_1	1b	disseminated-altered	3495	519689	16.9	16.6	292	474677	753	286	210	27	0.7	39.3	13.8	<0.06	1.4	<0.08	0.01	0.25	2.4	<0.79	<0.03	0.15	0.03	183	0.26
4_z4_2	1b	disseminated-altered	1525	521409	7.2	22.7	122	475464	268	187	29.2	12.8	0.42	633	3.4	<0.44	0.4	<0.07	<0.004	0.33	2.7	0.2	<0.02	0.19	0.05	109	0.47
GS-22-06
5_z1_1	1a	veinlet	3585	555236	12	91.9	123	426539	120	83.7	6159	2666	0.46	4422	9.3	4.6	7.2	17	<0.05	0.41	9.4	4	1.4	1.8	0.29	772	0.36
5_z1_2	1a	veinlet	7172	545436	12.6	4.8	54.7	441633	81.2	113	1736	60.4	1	2991	<3.8	6.5	8.6	0.95	0.05	0.17	7.5	5.9	1.3	0.57	0.09	546	0.92
5_z1_3	1a	veinlet	905	562014	0.52	<1.5	12.7	429209	120	85.6	472	25	<0.03	6977	7.9	0.17	3.7	<0.17	<0.009	<0.35	5.3	3.6	<0.05	1.2	0.02	148	0.25
5_z1_4	1a	veinlet	14140	587872	<0.30	5.8	225	386427	236	775	1743	8135	<0.05	340	<14.5	<0.17	1.9	34.9	<0.06	<0.57	3.3	1.1	<0.08	<0.03	<0.02	59.1	0.24
5_z2_1	1a	veinlet	970	541919	6.7	1.7	106	447797	104	124	6845	148	0.41	1398	12.1	3.6	7.2	0.99	0.04	0.46	10.3	1.5	0.44	0.27	0.19	542	0.32
5_z2_2	1a	veinlet	<361	524651	7.6	2.4	72.4	473523	122	112	551	11.4	0.07	794	6.3	1	4.4	<0.11	0.04	0.18	2.4	0.85	0.14	0.64	0.04	99.1	0.09
5_z2_3	1a	disseminated	482	509261	0.25	<0.77	11.2	487605	29.3	76.1	2312	10.1	<0.06	48.2	3.6	0.77	9.9	<0.09	0.01	<0.25	2.4	4.8	0.06	0.36	0.04	137	0.85
5_z2_4	1a	disseminated	29350	474111	33.9	<1.5	41202	451534	213	66.6	2596	92.6	4.3	303	<8.4	0.7	1.4	0.58	0.09	2.2	2.9	<0.53	1.2	1.7	0.43	135	0.23
5_z2_5	1a	veinlet	1341	539855	3.5	4.6	56.3	450475	157	107	4469	53.6	0.35	2744	8.6	2.2	6.8	0.24	<0.008	<0.29	4.7	4.5	0.1	1.2	0.19	688	0.33
5_z3_1	1a	disseminated	16139	546316	15.5	25	269	432230	136	100	1150	28.8	0.5	436	19.3	0.41	5.7	0.68	<0.04	<0.16	4.7	4.7	0.06	0.29	0.12	3079	1.5
5_z4_1	1a	disseminated	4952	571632	59.2	355	1905	416613	214	147	829	571	1.7	2218	27.2	1.4	9	<0.22	0.02		5.9	4.8	0.85	0.6	0.06	377	0.41
5_z4_2	1a	disseminated	1081	548208	13.7	<0.72	64.1	446635	420	403	569	432	0.22	1837	18.7	0.81	4.3	0.59	0.02	<0.27	3.5	6.8	0.21	0.79	0.03	231	0.22
GS-36-05
6_z1_1	4	disseminated	11910	490420	260	2.4	73.1	414355	64.1	9.7	480	75.1	2.4	1031	5.9	15.7	13.9	2.1	0.32	89.1	107	31	1391	3.6	6.4	341	0.79
6_z1_2	4	Py stringer	335	479603	1.3	<0.40	82.4	517107	11.5	68.2	546	102	0.39	199	4.1	0.49	23.9	1.7	0.03	0.18	102	31.8	0.62	3	0.26	1762	1.3
6_z1_3	4	Py stringer	388	501208	3.1	0.6	307	497735	7.5	23.2	75.2	4.9	0.13	60.2	3.2	0.13	0.94	<0.06	<0.004	0.2	3.7	2.1	0.04	0.49	0.06	174	0.1
6_z1_4	4	Py stringer	1942	502236	9.6	0.95	812	492524	8.4	39.5	146	47.9	0.87	110	<3.9	<0.44	13.5	0.31	0.02	0.78	45.1	20.8	0.44	1.8	0.15	2012	1.2
6_z1_5	4	Py stringer	259	522701	1.3	2.1	125	475183	17.5	<1.6	119	43.3	<0.01	748	4.8	0.09	12.3	0.2	<0.004	0.15	32.8	17.6	0.08	2	0.21	727	0.79
6_z1_6	4	Py stringer	<192	528035	0.51	<0.93	33.5	470950	15.2	2.4	193	6.4	0.03	73.5	6.2	0.47	13.3	<0.09	<0.005	<0.20	8.1	15.6	0.04	2.2	0.16	642	0.55
6_z1_7	4	Py stringer	1185	507158	0.87	<0.73	76.7	449087	9.8	2.8	3949	1084	0.28	1827	20.1	0.11	44.1	15.3	<0.03		1340	50.3	0.12	61.9	0.22	34069	12.1
6_z1_8	4	disseminated	33641	506921	66.8	<1.4	48.4	437795	50.7	10.6	235	68	7.8	2189	<5.2	6.9	23.6	1.6	0.15	22.6	68	39.2	252	3.3	2.1	4148	1.3
6_z1_9	4	Py stringer	<369	550189	0.16	<0.87	1.8	449439	10.4	28.3	39.4	2.8	<0.02	10.9	7	0.45	1.2	<0.11	0.03	0.17	0.49	1.4	0.55	0.43	0.02	252	0.16
GS-22-07
7_z1_1	4	disseminated	2471	555467	<0.13	<0.84	<0.37	441804	13.7	132	6.9	2.5	<0.06	46.8	43.9	0.18	2	<0.13	<0.007	0.28	0.1	<0.79	0.04	0.05	<0.02	4.1	1.7
7_z1_2	4	disseminated	<504	561778	<0.11	<1.4	<0.49	437996	19.1	155	<6.2	<0.83	<0.03	18.5	32.3	<0.09	<0.02	<0.15	<0.10	<0.30	0.03	<0.32	<0.04	<0.02	<0.008	0.3	0.11
7_z1_3	4	disseminated	<434	556387	<0.19	<0.88	<0.32	443371	9.8	140	<7.0	1.4	0.03	29.8	49.3	4.8	0.19	0.2	<0.008	<0.36	<0.02	0.42	<0.04	0.05	<0.008	1.2	0.06
7_z1_4	4	disseminated	263	521424	<0.22	<0.78	0.64	476731	10	103	126	2.4	<0.09	44.7	27	0.11	10.2	<0.12	0.01	0.18	0.27	14.5	<0.03	1.1	<0.007	1236	5.7
7_z2_1	4	polymetallic breccia	366	565225	0.23	2	4.4	430375	48.8	316	717	12.2	<0.04	18.2	29.4	<0.06	2869	<0.10	0.11	0.32	<0.03	<0.21	0.06	6.5	0.01	5	0.6
7_z2_2	4	polymetallic breccia	569	546720	0.38	3	6.3	449272	49.4	82.3	3227	7	0.06	14.9	31.6	0.68	0.16	0.12	0.01	0.2	0.07	1	0.3	0.89	0.08	0.96	0.06
7_z2_3	4	polymetallic breccia	<250	555891	<0.15	<0.92	1.7	443379	56.2	192	400	15	<0.02	26.1	35.3	<0.08	0.12	0.29	0.02	<0.18	0.09	0.59	<0.03	0.17	0.03	0.47	<0.03
7_z2_4	4	polymetallic breccia	320	560748	0.21	2.5	<0.46	436793	80.1	65.8	928	73.4	<0.02	13	34.6	3.1	1.9	0.25	0.01	0.23	0.35	1.6	<0.03	0.52	0.01	928	5.1
7_z2_6	4	polymetallic breccia	<192	563473	<0.10	<0.96	4.6	435906	44.9	37.6	462	10.9	<0.02	19.4	35.3	<0.05	1.3	0.22	0.01	0.13	<0.01	<0.19	0.11	2.2	<0.005	1.2	0.1
7_z3_1	4	polymetallic breccia	283	557532	0.17	<0.94	0.45	441937	35.6	29.4	55.8	5	<0.08	18.2	27.4	0.28	<0.07	<0.11	0.01	<0.20	0.26	0.45	<0.03	70.8	0.02	1.5	0.34
7_z3_2	4	polymetallic breccia	<406	556384	<0.13	<0.95	0.86	440435	57.5	66.6	424	4.8	<0.02	51.9	45.9	<0.42	3	0.18	0.01	<0.25	<0.10	2.3	<0.03	0.22	0.02	2509	14.5
7_z3_3	4	polymetallic breccia	1016	547981	0.94	<0.94	2.1	450676	40.5	154	40.1	4.7	0.15	17	28.7	<0.29	0.36	<0.12	<0.006	<0.24	0.13	0.66	0.05	0.15	0.01	16.2	0.75
7_z3_4	4	polymetallic breccia	<225	561529	<0.25	<0.75	0.31	437732	84.1	72.5	342	150	0.03	41.7	40.4	<0.06	2.9	<0.10	<0.005	<0.14	<0.18	0.4	<0.03	0.21	<0.006	0.75	0.26
7_z3_5	4	polymetallic breccia	5569	521072	4.7	<1.1	7.5	473008	48.5	34.3	8	33.6	1.2	24.7	29.8	<0.06	0.98	<0.11	<0.02	0.53	0.22	1.6	0.54	0.12	0.11	50.4	0.48
7_z3_6	4	polymetallic breccia	<534	574005	<0.22	<1.8	<0.60	424876	76.5	64.7	34.7	882	<0.13	19.3	28.7	0.67	0.2	6.2	<0.04	0.07	<0.02	0.68	<0.05	<0.08	<0.01	4	0.55
GS-38-08
8_z1_1	1b	Py veinlet	496	536278	<0.10	<0.67	0.33	462539	402	196	15.4	5.4	<0.01	49.7	<4.2	<0.21	0.62	<0.08	<0.004	0.19	0.18	<0.17	0.09	<0.04	<0.005	12.7	0.12
8_z1_2	1b	Py veinlet	<465	560205	<0.20	<1.4	1.3	439054	140	473	67.8	2.4	<0.03	44.3	7.5	<0.47	0.43	<0.16	0.05	<0.13	0.05	0.99	<0.16	0.07	0.02	3.3	0.06
8_z1_3	1b	Py veinlet	1791	544267	<0.16	<1.3	179	452727	62.3	510	49.8	56.7	<0.03	56.7	7.1	<0.09	4.6	0.33	<0.03	<0.33	20.9	5.7	<0.04	0.26	<0.08	258	1.8
8_z1_4	1b	Py veinlet	<318	516828	0.13	<0.92	<0.29	482429	242	436	<3.1	3.5	<0.08	36.4	7.8	<0.28	1.4	<0.11	0.01	<0.10	0.32	1.3	0.04	0.47	<0.06	5.4	0.25
8_z1_5	1b	Py veinlet	659	499364	0.93	1	43.4	499364	71.6	28.9	81.1	2.4	<0.06	281	<1.9	<0.05	5	<0.09	<0.005	<0.14	57.9	1.9	<0.02	0.25	2.7	30.7	0.09
8_z1_6	1b	Py veinlet	28081	532539	<0.15	<0.95	<0.66	438266	94.3	320	13.7	532	<0.03	64.5	<13.0	<0.47	8.1	5.2	<0.04	<0.38	1.6	8.7	<0.05	0.9	0.02	62.2	0.78
8_z1_7	1b	Py veinlet	<353	523476	0.16	<0.92	0.52	475713	42	536	13.3	3.1	<0.02	60.6	9.6	<0.33	41.1	<0.14	<0.03	<0.33	1.5	55.4	<0.04	6.8	<0.007	36.6	0.61
8_z2_1	1b	disseminated	1527	550328	18.5	7.6	0.77	434737	712	305	131	3.6	0.03	2181	4	3.9	2.4	0.14	0.01	0.55	57.4	3.3	32.7	0.88	1.1	45.1	0.11
8_z2_2	2		12410	544672	26.2	7.3	4	441254	579	400	15	24.8	1.3	207	8.6	0.27	0.68	<0.10	0.01	0.3	2.5	1.2	4.3	0.03	0.2	12.5	0.15
8_z2_4	2		16348	554161	1.1	<1.4	1.5	428551	317	490	17.5	10	0.32	80.4	3.1	<0.09	0.37	<0.16	0.01	<0.31	3.3	0.5	<0.04	0.17	0.16	7.4	0.05
8_z2_5	2		41298	547775	126	32.6	11.2	409300	321	437	24.5	45.6	6	33.9	<9.7	<0.83	0.61	<0.29	<0.02	0.55	0.76	0.99	2.6	0.16	0.27	6.7	0.33
8_z2_6	1b	disseminated-altered	1416	597368	2.1	<2.8	<0.84	397095	90.9	79.4	88.6	1116	0.13	2302	<13.8	<0.17	14.8	12.4	0.02	<0.40	93.2	70.2	<0.08	3.8	19.3	218	4.2
8_z2_7	2		<704	608066	<0.26	<2.3	<0.72	391219	193	467	<6.6	2.3	<0.04	51	<11.2	<0.15	0.17	<0.25	<0.01	<0.35	0.12	<0.51	<0.06	0.18	<0.01	0.76	<0.06
8_z3_1	1b	Py veinlet	<476	577748	<0.27	<1.4	<0.42	421394	143	487	36.2	3.5	<0.10	139	5.2	<0.09	2	<0.16	0.09	0.22	1.1	4.8	<0.04	0.72	0.02	34.1	0.43
8_z3_10	1b	Py veinlet	2070	552498	6.5	1.2	3.3	443770	459	197	24.2	757	0.23	95	<6.5	<0.06	14.2	5.6	0.01	0.28	10.5	5.7	0.04	0.49	0.19	60.4	0.66
8_z3_2	1b	Py veinlet	864	567769	7.8	2.1	2.2	430039	33.9	344	227	30	0.28	61.5	5.6	<0.05	0.34	<0.10	<0.04	0.21	0.97	1.3	2.6	2.2	0.01	13.8	0.24
8_z3_3	1b	Py veinlet	431	556544	0.51	0.86	0.65	441426	249	235	530	6.5	<0.02	431	<5.4	<0.07	8.9	<0.12	<0.02	<0.22	66.3	11.1	0.07	1.8	3.3	43.9	0.39
8_z3_4	1b	Py veinlet	<246	537394	<0.13	<0.65	2.1	460808	302	354	909	84.4	<0.01	96.7	8.6	0.35	2.1	1.2	0.03	0.16	15.6	3.2	0.21	0.15	<0.004	14.3	0.28
8_z3_5	1b	Py veinlet	<261	578466	<0.15	1.6	0.47	419143	109	490	711	376	<0.02	482	6.7	0.11	5.6	6.7	<0.03	0.16	128	3.5	<0.03	0.4	0.09	62.9	0.97
8_z3_6	1b	Py veinlet	<279	572158	0.74	1.1	1.2	426861	131	217	82.9	5	0.03	391	5	0.1	6.2	<0.11	0.05	<0.17	95.2	1.5	<0.03	0.49	3.3	32.1	0.18
8_z3_7	1b	Py veinlet	<225	571654	0.21	<0.68	<0.21	427533	330	238	20.1	6.9	<0.02	106	<16.9	0.14	0.58	<0.10	<0.005	<0.25	4.8	1.5	0.39	2.4	0.11	23.3	0.71
8_z3_8	1b	Py veinlet	1168	529067	9.9	6	1108	463270	181	158	779	497	0.15	2404	<4.3	<0.21	31.6	3.9	0.05	0.13	725	12	1.2	1.4	23.2	293	2.2
8_z3_9	1b	Py veinlet	8472	562465	6.5	4.7	6.6	426216	456	291	183	44.5	0.43	118	7.1	<0.08	4.4	<0.53	<0.007	<0.24	12.3	5.5	0.78	0.12	0.31	1659	4.7
GS-34-05
9_z1_1	1b	dismembered veinlet	320	529787	0.19	2.7	1.9	468622	120	668	414	11.1	0.07	4.7	31.1	0.38	0.88	<0.09	0.04	<0.32	0.12	0.48	0.08	1.4	0.17	8.5	0.16
9_z1_2	1b	dismembered veinlet	406	531283	0.37	3	15.1	465634	177	1083	1015	35.9	0.04	183	17.5	<0.05	46.7	<0.58	0.03	<0.24	1.9	60.2	0.53	4.8	0.02	22.6	0.62
9_z1_3	1b	dismembered veinlet	616	527955	7.3	5.2	3.4	466316	384	491	697	8.6	0.11	27.8	40.2	0.29	8.7	0.11	0.01	<0.20	2.4	48.2	9.2	3.8	0.05	55.4	2.7
9_z3_1	1b	dismembered veinlet	2042	499204	3.7	3	0.92	496142	503	351	1429	13.3	<0.51	88.8	25.6	<0.09	6.8	<0.11	<0.01	<0.20	0.95	15.3	2.1	0.14	0.04	17.7	0.17
9_z3_2	1b	dismembered veinlet	1246	520319	19.5	55.9	30.5	477100	492	166	169	6.6	0.81	99.1	30.9	<0.07	8.6	<0.08	<0.008	<0.15	6.3	55.1	0.35	5.6	0.14	173	1
9_z6_1	1b	dismembered veinlet	1356	548146	7.2	5.7	11.4	447862	705	509	558	6.7	0.14	46.8	25.1	<0.11	34.2	<0.14	<0.04	0.24	1.7	41	14.5	6.2	<0.01	29.7	1.3
9_z6_2	1b	dismembered veinlet	21320	546010	172	88.7	9.9	427708	636	476	572	125	8.8	533	26.7	0.42	793	0.53	0.08	0.68	8.1	611	13.7	26	0.3	49.4	3.7
9_z6_3	1b	dismembered veinlet	2738	539878	15.6	9.4	3.2	454461	856	265	209	11.2	0.67	70.1	23.3	2.4	209	0.45	0.04	<0.92	2.4	238	12.8	10.3	0.03	119	2.3
GS-22-08
10_z1_1	2		15890	542077	7.7	4.9	3.5	440501	518	754	6	15.3	0.61	152	6.6	<0.09	0.1	0.21	<0.01	<0.28	0.18	0.5	0.2	0.22	0.03	6.7	0.21
10_z1_2	1b	disseminated-altered	6609	513629	50.7	137	589	474346	1326	166	815	64.8	1.7	248	10.8	0.16	2.7	0.78	0.04	<0.55	7.1	8.2	1.7	0.86	0.21	372	8
10_z1_3	2		376	536646	<0.15	<2.0	<0.45	461620	263	875	60.4	1.8	<0.03	143	9.7	<0.10	0.21	<0.14	<0.01	<0.25	0.06	1.1	<0.05	0.36	<0.01	1.7	0.23
10_z1_4	1b	disseminated-altered	7906	510677	59.3	118	665	474385	1624	153	415	29.4	1.7	238	5.3	<0.07	1.6	<0.08	<0.03	0.46	8.3	4.3	11.6	0.39	0.35	269	2.2
10_z1_5	2		414	548642	<0.27	1.2	2.4	448269	628	1462	312	3.8	<0.03	252	7.1	<0.09	0.16	<0.12	<0.01	<0.57	0.09	0.49	<0.04	0.09	0.04	1.7	0.04
10_z1_6	1b	disseminated-altered	7508	524839	45.1	191	414	461769	1877	271	788	39	1.8	228	4.9	<0.06	1.8	<0.07	0.01	<0.30	8.5	16.3	2.3	0.47	0.21	311	3.5
10_z5_1	2		288	532330	0.14	<0.71	0.67	465189	144	1623	208	4.8	<0.02	203	7.4	0.1	0.28	<0.06	<0.05	<0.12	0.17	0.3	0.18	0.34	0.05	1.1	0.14
10_z5_2	1b	disseminated-altered	5198	530599	30.3	35.7	1213	454799	1343	240	128	28.2	1.3	1224	7.1	<0.14	1.2	<0.17	0.02	<0.45	4.4	1.6	14	260	0.13	91	0.83
10_z5_3	2		1810	545926	<0.26	<1.0	0.87	450651	576	511	295	3.2	<0.03	207	6.2	<0.77	0.55	<0.11	<0.04	<0.18	0.35	0.41	0.13	0.49	<0.008	9.9	0.62
10_z5_4	1b	disseminated-altered	2244	510603	34.5	48.9	14.2	437780	1380	568	85.5	18.5	0.25	204	7.8	1.2	1.9	<0.08	<0.03	1.1	12	8.1	52.5	0.44	0.05	77.1	2.2
10_z5_5	2		322	555035	0.16	<0.93	2	443351	425	745	3	2.7	0.08	91.7	7.4	<0.07	0.12	<0.08	0.06	<0.18	<0.07	<0.22	0.05	0.26	0.06	1.1	0.03
10_z5_6	1b	disseminated-altered	9107	530100	60.7	13.8	350	457707	186	122	91.9	21.8	1.9	108	<2.9	<0.06	1.5	<0.08	0.03	0.22	6.3	5.1	4.5	0.25	0.16	98.9	0.81
GS-38-05
11_z2_1	2		2458	565909	<0.45	<1.3	4	430441	25	56.6	371	2.7	0.25	705	<9.1	0.13	0.39	0.69	<0.05	<0.28	1.6	0.42	<0.21	0.31	<0.04	23.7	0.07
11_z2_2	1b	dismembered veinlet -altered	1522	554636	1.2	3.8	17.8	433754	37.7	86	320	8.2	0.08	9493	<4.3	<0.07	3.8	0.6	0.03	0.5	5.4	3.8	<0.40	9.5	<0.05	93.2	0.15
11_z2_3	2		772	566914	1.9	3.1	2.3	432099	22.1	23	<4.5	<4.6	0.06	144	10.5	<1.1	0.04	<0.16	0.04	<0.39	0.28	<0.43	<0.06	0.1	<0.01	6.2	0.01
11_z2_4	1b	dismembered veinlet -altered	2661	571612	<0.20	<2.5	<0.46	422345	10.5	25.5	35.9	<5.3	<0.05	3263	3.7	<1.3	1.4	<0.19	<0.02	<0.45	3.3	<0.49	<0.07	0.64	0.1	37.7	0.04
11_z8_1	1b	dismembered veinlet -altered	2393	566653	4.8	13.8	4.4	419648	40.2	59	137	137	0.41	3333	<4.1	4	33.3	0.74	<0.04	<0.26	17.3	6.2	3.4	1.5	0.22	7436	0.51
11_z8_2	2		9027	557829	1.9	6.1	4.4	431681	90.3	145	10.8	3.6	<0.17	1134	<8.6	2.4	0.75	<0.16	<0.06	<0.70	1.3	0.89	0.39	0.3	0.01	60.2	0.06
11_z8_3	2		8510	586036	0.98	3.9	13.9	396493	47.4	158	174	90.9	0.09	6576	2.1	0.86	10.8	<0.56	<0.05	<0.38	18.4	4	0.69	3.2	0.09	1847	0.13
11_z8_4	2		362	549685	0.06	<0.91	0.4	448507	42.3	88.3	400	106	0.03	748	1.4	0.1	3.3	0.8	0.23	0.29	4.8	2.1	<0.03	2.7	<0.005	44.5	0.19
